# Supplementary material
Source: PubMed Central journal article supplement (PMC3209201)
Supplement: supp_193.22.6366_SuppMaterial1.pdf [file supp_193.22.6366_SuppMaterial1.pdf]

## **Supplementary Material**

**Just-in-Time Control of Spo0A Synthesis in *Bacillus subtilis* by multiple regulatory mechanisms.**

Arnaud Chastanet and Richard Losick

**Table S1. *B. subtilis* strains used in this study.**

| Name    | Genotype                                         | Construction or Reference                            |
|---------|--------------------------------------------------|------------------------------------------------------|
| PY79    | prototrophic                                     | (31)                                                 |
| RL3170  | $\Delta spo0H::cat$                              | lab collection                                       |
| RL4259  | $\Delta spo0B::Km$                               | lab collection                                       |
| 786     | $\Delta P_s spo0A$                               | this study, PY79 cured from psk5                     |
| 875     | $\Delta P_v O_{1-3} spo0A$                       | this study, PY79 cured from pAC306                   |
| 883     | $\Delta O_{1-3} spo0A$                           | this study, PY79 cured from pAC313                   |
| 894     | $\Delta P_v spo0A$                               | this study, PY79 cured from pAC328                   |
| ABS988  | $amyE::P_{s(wt)}.0A-lacZ- spc$                   | this study, pAC407 -> PY79                           |
| ABS1085 | $amyE::P_{s(wt)}.0A-lacZ- spc::cat$              | this study, pDAG32 -> ABS988                         |
| ABS955  | $amyE::P_{s(\Delta O_{1-3})}.0A-lacZ- spc$       | this study, pAC370 -> PY79                           |
| ABS1112 | $amyE::P_{s(wt)}.0A-lacZ- spc::cat$              | $\Delta spo0B::km$<br>this study, RL4259 -> ABS1085  |
| ABS1149 | $amyE::P_{s(\Delta O_{1-3})}.0A-lacZ- spc$       | $\Delta spo0B::km$<br>this study, RL4259 -> ABS955   |
| ABS999  | $amyE::P_{s(\Delta A-rich)}.0A-lacZ- spc$        | this study, pAC413 -> PY79                           |
| ABS956  | $amyE::P_{s(\Delta O_{1-3} Arich)}.0A-lacZ- spc$ | this study, pAC374 -> PY79                           |
| ABS1048 | $amyE::P_{s(m1)}.0A-lacZ- spc$                   | this study, pAC463 -> PY79                           |
| ABS1055 | $amyE::P_{s(m2)}.0A-lacZ- spc$                   | this study, pAC458 -> PY79                           |
| ABS1205 | $amyE::P_{s(m3)}.0A-lacZ- spc$                   | this study, pAC507 -> PY79                           |
| ABS1172 | $amyE::P_{s(m2m3)}.0A-lacZ- spc$                 | this study, pAC497 -> PY79                           |
| ABS1042 | $amyE::P_{s(m4)}.0A-lacZ- spc$                   | this study, pAC453 -> PY79                           |
| ABS1173 | $amyE::P_{s(m1m2m3)}.0A-lacZ- spc$               | this study, pAC498 -> PY79                           |
| ABS1034 | $amyE::P_{s(ins5)}.0A-lacZ- spc$                 | this study, pAC434 -> PY79                           |
| ABS1035 | $amyE::P_{s(ins11)}.0A-lacZ- spc$                | this study, pAC436 -> PY79                           |
| ABS1223 | $amyE::P_{s(wt-VG)}.0A-lacZ- spc$                | this study, pAC527 -> PY79                           |
| ABS1224 | $amyE::P_{s(m2-VG)}.0A-lacZ- spc$                | this study, pAC528 -> PY79                           |
| ABS1226 | $amyE::P_{s(m3-VG)}.0A-lacZ- spc$                | this study, pAC531 -> PY79                           |
| ABS1227 | $amyE::P_{s(m2m3-VG)}.0A-lacZ- spc$              | this study, pAC533 -> PY79                           |
| ABS1229 | $amyE::P_{v(wt)}.lacZ- spc$                      | this study, pAC557 -> PY79                           |
| ABS1230 | $amyE::P_{v(m2)}.lacZ- spc$                      | this study, pAC559 -> PY79                           |
| ABS1231 | $amyE::P_{v(m3)}.lacZ- spc$                      | this study, pAC538 -> PY79                           |
| ABS1234 | $amyE::P_{v(m1)}.lacZ- spc$                      | this study, pAC563 -> PY79                           |
| ABS1045 | $amyE::P_{vs(wt)}.lacZ- spc$                     | this study, pAC454 -> PY79                           |
| ABS1041 | $amyE::P_{vs(mi)}.lacZ- spc$                     | this study, pAC450 -> PY79                           |
| ABS997  | $amyE::P_{vs(wt)}.0A-lacZ- spc$                  | this study, pAC408 -> PY79                           |
| ABS962  | $amyE::P_{vs(mi)}.0A-lacZ- spc$                  | this study, pAC391 -> PY79                           |
| ABS1050 | $amyE::P_{vs(wt)}.lacZ- spc$                     | $\Delta spo0H::cat$<br>this study, RL3170 -> ABS1045 |
| ABS1049 | $amyE::P_{vs(mi)}.lacZ- spc$                     | $\Delta spo0H::cat$<br>this study, RL3170 -> ABS1041 |
| ABS1021 | $amyE::P_{vs(wt)}.0A-lacZ- spc$                  | $\Delta spo0H::cat$<br>this study, RL3170 -> ABS997  |
| ABS1019 | $amyE::P_{vs(mi)}.0A-lacZ- spc$                  | $\Delta spo0H::cat$<br>this study, RL3170 -> ABS962  |
| ABS957  | $amyE::P_{s(mi)}.0A-lacZ- spc$                   | this study, pAC378 -> PY79                           |

**Table S2. Plasmids used in this study.**

| Plasmids | Description                                                                                                        | Reference or construction                           |
|----------|--------------------------------------------------------------------------------------------------------------------|-----------------------------------------------------|
| pSK5     | plasmid for marker-less deletion of P <sub>s</sub>                                                                 | (27)                                                |
| pMAD     | plasmid for in frame marker-less deletion                                                                          | (1)                                                 |
| pDG1728  | plasmid for integrating <i>lacZ</i> fusion at <i>amyE</i>                                                          | *                                                   |
| pET28a   | plasmid for expression of recombinant protein in <i>E. coli</i> with a 6xhis tag                                   | Novagen                                             |
| pAC571   | pET28a derivative, carrying full length <i>spo0A</i> orf under IPTG inducible promoter                             | AC883-885 (NcoI-XhoI)                               |
|          | pMAD derivative carrying <i>spoIVB-spo0A</i> intergenic fragment:                                                  |                                                     |
| pAC306   | deleted for P <sub>v</sub> and O <sub>1-3</sub>                                                                    | AC739-740 (NcoI-EcoRI) +<br>AC744-742 (EcoRI-BamHI) |
| pAC313   | deleted for O <sub>1-3</sub>                                                                                       | AC739-743 (NcoI-EcoRI) +<br>AC744-742 (EcoRI-BamHI) |
| pAC328   | deleted for P <sub>v</sub>                                                                                         | AC739-740 (NcoI-EcoRI) +<br>AC741-742 (EcoRI-BamHI) |
|          | pDG1728 derivatives carrying P <sub>s</sub> (but not P <sub>v</sub> ) in translational fusion with <i>lacZ</i> :   |                                                     |
| pAC407   | wild type                                                                                                          | AC796-781 (EcoRI-SalI)                              |
| pAC378   | containing 8 mutations between O1 and O2                                                                           | AC783-781 (EcoRI-SalI)                              |
| pAC370   | deleted of O1-O3                                                                                                   | AC786-781 (EcoRI-SalI)                              |
| pAC413   | deleted of the A-rich area                                                                                         | AC796-788+AC789-781 (EcoRI-SalI)                    |
| pAC374   | deleted of O1-O3 and the A-rich area                                                                               | AC787-781 (EcoRI-SalI)                              |
| pAC463   | mutated on O1                                                                                                      | AC816-781 (EcoRI-SalI)                              |
| pAC458   | mutated on O2                                                                                                      | AC814-781 (EcoRI-SalI)                              |
| pAC507   | mutated on O3                                                                                                      | AC820+821-781 (EcoRI-SalI)                          |
| pAC497   | mutated on O2 and O3                                                                                               | AC814 on pAC507 (EcoRI-SalI)                        |
| pAC453   | mutated on O4                                                                                                      | AC796-812+AC813-781 (EcoRI-SalI)                    |
| pAC498   | mutated on O1, O2 and O3                                                                                           | AC811 on PAC497 (EcoRI-SalI)                        |
| pAC434   | with a 5 bp insertion                                                                                              | AC796-809+AC808-781 (EcoRI-SalI)                    |
| pAC436   | with a 11 bp insertion                                                                                             | AC796-811+AC810-781 (EcoRI-SalI)                    |
| pAC527   | containing P <sub>spoVG</sub> SigH binding site                                                                    | QC AC852-853 on pAC407                              |
| pAC528   | containing P <sub>spoVG</sub> SigH binding site, and mutated on O2                                                 | QC AC852-853 on pAC458                              |
| pAC531   | containing P <sub>spoVG</sub> SigH binding site, and mutated on O3                                                 | QC AC852-853 on pAC507                              |
| pAC533   | containing P <sub>spoVG</sub> SigH binding site, and mutated on O2 and O3                                          | QC AC852-853 on pAC497                              |
|          | pDG1728 derivatives carrying P <sub>v</sub> (but not P <sub>s</sub> ) in transcriptional fusion with <i>lacZ</i> : |                                                     |
| pAC557   | wild type                                                                                                          | AC792-881 (EcoRI-BamHI)                             |
| pAC559   | mutated on O2                                                                                                      | AC792-857+AC856-881 (EcoRI-BamHI)                   |
| pAC538   | mutated on O3                                                                                                      | AC792-859+AC858-881 (EcoRI-BamHI)                   |
| pAC563   | mutated on O1                                                                                                      | AC792-855+AC854-881 (EcoRI-BamHI)                   |
|          | pDG1728 derivative carrying complete P <sub>spo0A</sub> :                                                          |                                                     |
| pAC454   | in transcriptional fusion with <i>lacZ</i> , and wild type                                                         | AC792-880 (EcoRI-BamHI)                             |
| pAC450   | in transcriptional fusion with <i>lacZ</i> , and containing 8 mutations between O1 and O2                          | AC792-793+AC794-880 (EcoRI-BamHI)                   |
| pAC408   | in translational fusion with <i>lacZ</i> , and wild type                                                           | AC792-781 (EcoRI-SalI)                              |
| pAC391   | in translational fusion with <i>lacZ</i> , and containing 8 mutations between O1 and O2                            | AC792-793+AC794-781 (EcoRI-SalI)                    |

\* Guerout-Fleury, A. M., N. Frandsen, and P. Stragier. 1996. Plasmids for ectopic integration in *Bacillus subtilis*. Gene 180:57-61.

**Table S3. Oligonucleotides used in this study.**

---

| <b>name</b> | <b>sequence</b>                                        |
|-------------|--------------------------------------------------------|
| AC-470      | ttgccagtcacggttacggttattagttatag                       |
| AC-739      | cctccatggcgcaaaaacgatcgggatatt                         |
| AC-740      | ttcgaattcgtgaagagggatcaaaaataaaaa                      |
| AC-741      | aaagaattcctttttcgacaaattcacgtttccttg                   |
| AC-742      | gctggatccaatactgctttgcatgatggcgcac                     |
| AC-743      | gaagaattcaaatcctcttttgtatattttaccg                     |
| AC-744      | ggggaattcaaacagagaaaaacatagaataacaaag                  |
| AC-766      | gcaacacaaaactttaattttctccac                            |
| AC-781      | ttcgtcgcacttctatatattcacttaacaggc                      |
| AC-783      | aaatatacagaattcgatttttcgacaaattgagctatggaagtttgca      |
| AC-786      | acagaattcgaaaaacagagaaaaacatagaataac                   |
| AC-787      | actgaattcggtgattatgatTTTTTTtagaggg                     |
| AC-788      | cataatcaccttttcgactaaaaatgaaatttgac                    |
| AC-789      | tagtcgaaaggtgattatgatTTTTTTtagaggg                     |
| AC-792      | cagggaattcatatTTTatggaaaagaaaaagcaagctgac              |
| AC-793      | ttccatagctcaatttgctgaaaaatcctcttttgat                  |
| AC-794      | tgagctatggaagtttgcaaatctatttttagtcg                    |
| AC-796      | acagaattcgatttttcgacaaattcacgtttccttg                  |
| AC-808      | ttggtgattatcctatgatttttttagagggatatag                  |
| AC-809      | aaatcataagataatcaccaatattagtgccatattcttt               |
| AC-810      | ttggtgattatctagaggctatgatttttttagagggatatag            |
| AC-811      | aaatcatagcctctagataatcaccaatattagtgccatattcttt         |
| AC-812      | gctacatggttacattctccgtgaccgctatataccct                 |
| AC-813      | agggtatatagcgggtcacggagaatgtaaacaatgtagc               |
| AC-814      | acagaattcgatttttcgacaaattcacgtttccttgtttattaaatttcattt |
| AC-816      | acagaattcgatttttatataaaattcacgtttccttg                 |
| AC-820      | cacgtttccttgttgtcaaatttcatttttatttaaaaaaac             |
| AC-821      | acagaattcgatttttcgacaaattcacgtttccttgttgtcaaatttc      |
| AC-852      | cagaaaaaatcgtggaattgaaacatgtagcaagggtgaatcctggt        |
| AC-853      | gattttttctgaaatcctgctaaaaaatcataatcaccaatattagtggtc    |
| AC-854      | gatttttatataaaattcacgtttccttggt                        |
| AC-855      | gaatttatataaaaaatcctcttttgtatattttac                   |
| AC-856      | ccttgtttattaaatttcatttttagtcgaaaaac                    |
| AC-857      | gaaatttaataacaaggaaaacgtgaatttgctg                     |
| AC-858      | catttttattttaaaaacagagaaaaacatagaataac                 |
| AC-859      | ttttctctgtttttaaaaataaaaaatgaaattt                     |
| AC-880      | ggaggatccatgtagttaacaggattcaccttgctacat                |
| AC-881      | ggaggatcctctaaaaaaatcataatcaccaat                      |
| AC-883      | cggccAtggagaaaattaaagtttggtgctgat                      |
| AC-885      | ctcctcgagttaagaagccttatgctctaacctcagc                  |

---

Fig Sup 1

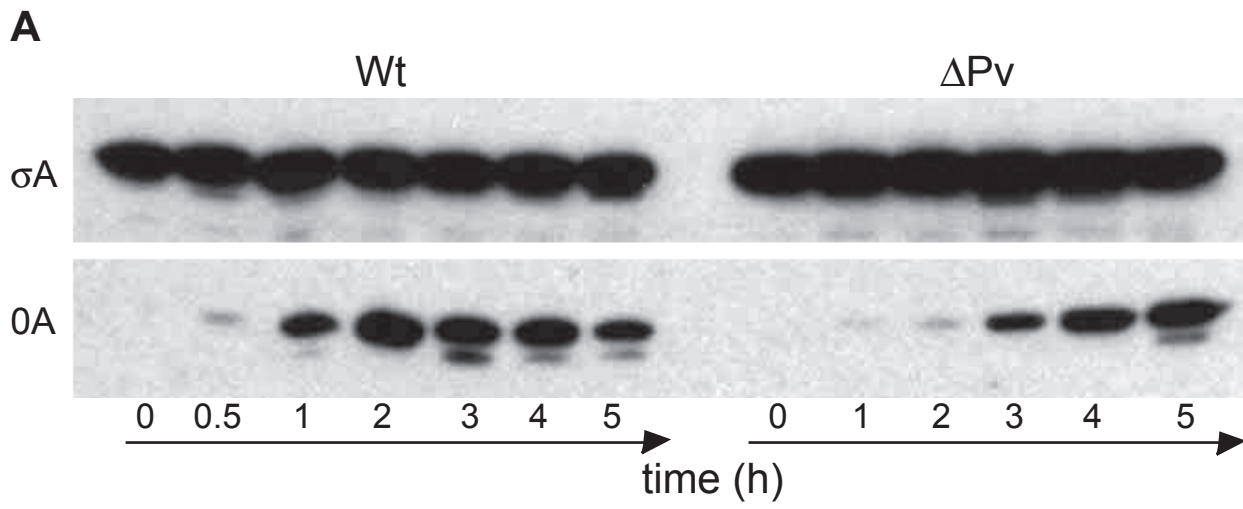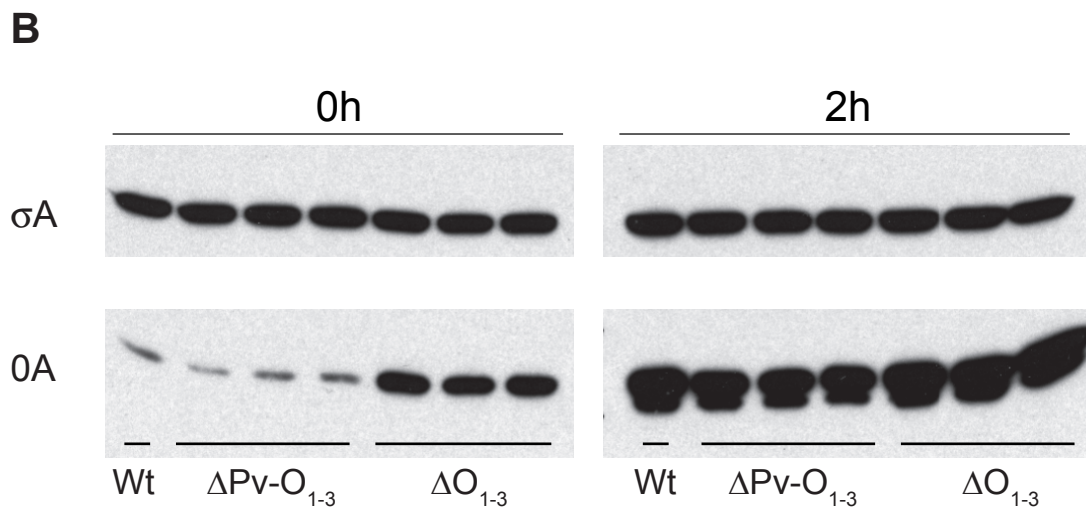

**Figure sup. 1. Immunoblot analysis of 0A accumulation.**

Panel A shows that accumulation of 0A is delayed and slowed in absence of  $P_v$ . Immunoblot analysis of 0A accumulation during sporulation was performed using samples taken during sporulation at the indicated times after resuspension. Equal amounts of protein, as quantified by the Bradford technique, were loaded as confirmed by the control immunoblot using anti-SigA ( $\sigma^A$ ). Samples were taken from shaking cultures at 37°C of wild type cells (Wt; PY79) and cells mutant for  $P_v$  ( $\Delta P_v$ ; Abs894).

Panel B shows that  $O_1$ - $O_3$  contains a regulatory element controlling  $P_s$ .

Presented is an immunoblot analysis of 0A accumulation during sporulation similar to Fig 2A, except that a longer exposure time was performed in order to observe 0A at time 0. Blots were performed using samples taken just before sporulation induction by resuspension (0h) and 2 h post-induction (2h). Equal amounts of protein, as quantified by the Bradford technique, were loaded as confirmed by the control immunoblot using anti-SigA ( $\sigma^A$ ) antibodies. Samples were taken from triplicate shaking culture at 37°C of wild type cells (Wt; PY79), cells mutant for  $O_{1-3}$  ( $\Delta O_{1-3}$ ; Abs883), and  $P_v$  plus  $O_{1-3}$  ( $\Delta P_v O_{1-3}$ ; Abs875).

Fig Sup 2

|     |                     | time |     | 90   |     |
|-----|---------------------|------|-----|------|-----|
|     |                     | 0    | + - |      | + - |
| I   | wt                  | 1.0  | 0.0 | 14.2 | 6.5 |
|     | m1                  | 0.8  | 0.3 | 16.5 | 3.1 |
| II  | m4                  | 0.4  | 0.1 | 3.4  | 0.7 |
|     | m3                  | 1.8  | 0.3 | 2.7  | 1.5 |
| III | m2                  | 5.7  | 1.5 | 17.7 | 5.6 |
| IV  | m2 m3               | 5.9  | 2.3 | 5.4  | 2.6 |
|     | m1 m2 m3            | 5.9  | 2.6 | 6.2  | 5.6 |
|     | $\Delta 123$        | 5.8  | 2.5 | 5.7  | 2.2 |
|     | $\Delta A$ rich     | 5.3  | 2.3 | 4.5  | 3.7 |
|     | $\Delta 123-A$ rich | 5.5  | 2.8 | 1.9  | 0.6 |

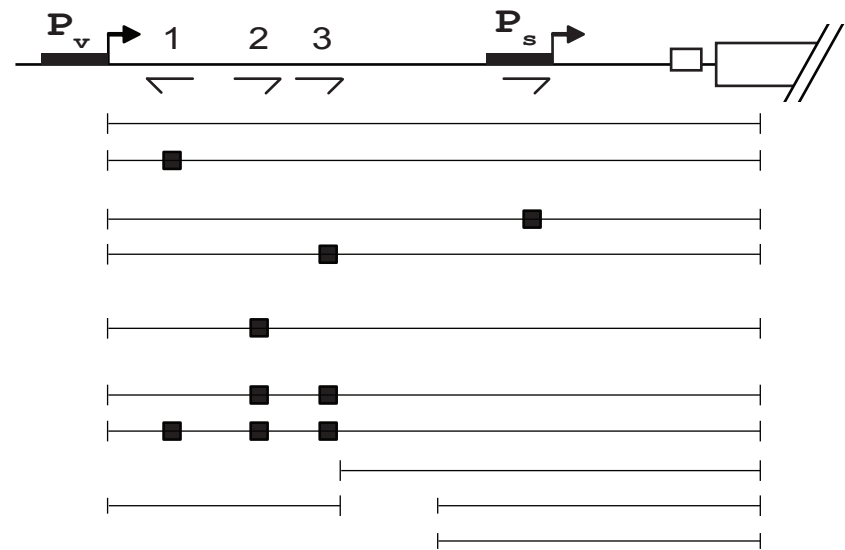

**Figure sup. 2. Mutagenesis of a *P<sub>s</sub>-lacZ* translational reporter fusion reveals four categories of mutants.**

Table (left hand panel) reports  $\beta$ -galactosidase activity of different translational fusions with *lacZ* that are depicted in right hand panel. Two time points, representative of exponential and sporulation phase of growth, were reported: time 0 corresponds to sample harvested just before induction of sporulation by resuspension, and time 90 to cells collected 90 minutes after induction. Values are presented as a ratio as compared to the specific activity of the wild type fusion during exponential growth (thus, the ratio for the wild type fusion at time 0 was 1). Bold values are averaged ratio of specific activities, followed by the standard deviations.

Four categories of phenotypes are:

**I- Wild type:** expression was minimal during exponential phase and strongly induced during sporulation; wild type (wt; Abs988), mutant of O<sub>1</sub> (m1; Abs1048).

**II- Shut down:** expression is minimal in every condition tested; mutant of site 3 (m3; Abs1205) or site 4 (m4; Abs1042).

**III- De-repressed:** intermediate level of expression during exponential phase and full induction during sporulation; mutant of site 2 (m2; Abs1055).

**IV- 0A insensitive:** expression is almost constant from time 0 to time 90; double mutant for site2 and 3 (m2m3; Abs1172), triple mutant for site 1, 2 and 3 (m1m2m3; Abs1173), fragment lacking O<sub>1-3</sub> ( $\Delta$ O<sub>1-3</sub>; Abs955), fragment lacking only A-rich area ( $\Delta$ A-rich; Abs999), fragment starting downstream of the A-rich area ( $\Delta$ 123 A-rich; Abs956).



Fig Sup 3

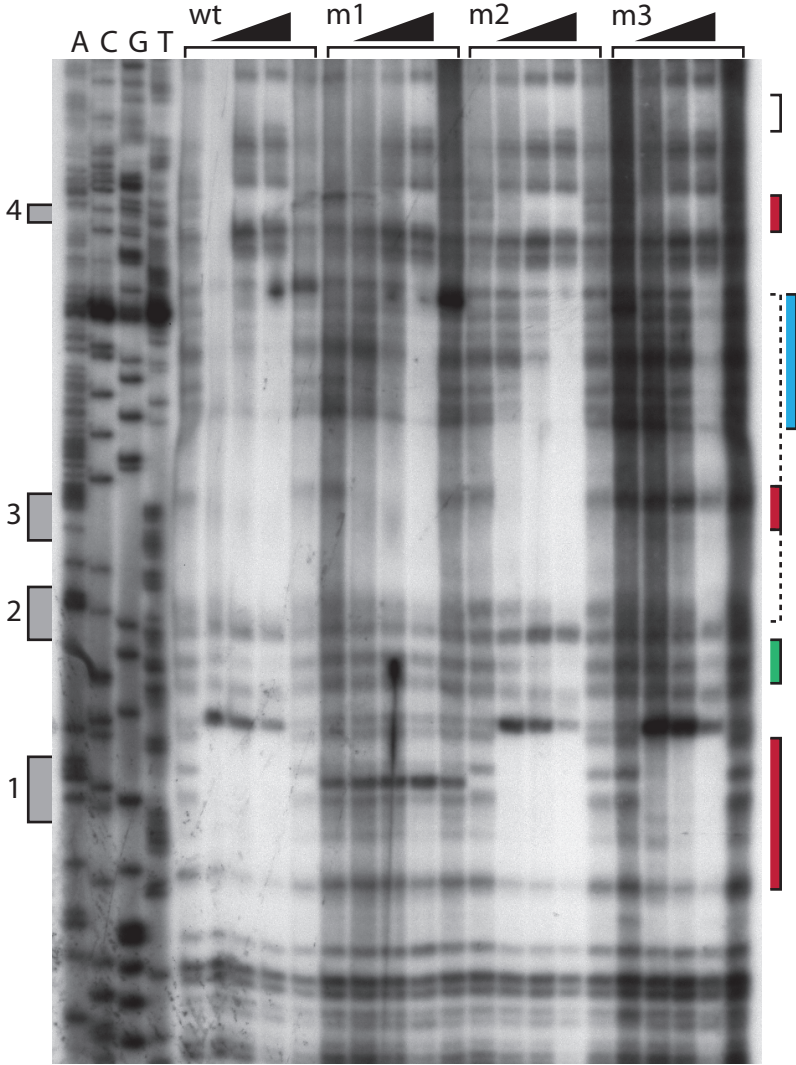

**Figure sup. 3. Mutations in O<sub>1</sub> and O<sub>3</sub> impair 0A binding to corresponding sites.** DNase I footprinting assays were performed using purified 0A and labeled DNA fragments as described in material and methods. 364 bp DNA fragments were amplified from plasmid pAC407 (wt), pAC463 (m1), pAC458 (m2) or pAC507 (m3) and incubated with varying amount of purified native 0A (0, 1, 3, 10, 0 μM). First four lanes correspond to dideoxy-sequencing ladders produced with the same labeled primer. Boxes on the left indicated the consensus 0A binding sequences. Bars on the right indicate areas protected from DNase I digestion and the dotted line indicates extension of the protection occurring at higher 0A concentration. Red boxes are areas matching with 0A-boxes O1, O3 and O4; the green box marks a protected area appearing only when O1 and O3 and present; the blue box marks an area protected at high 0A concentration despite the absence of protection on box O3.

Fig Sup 4

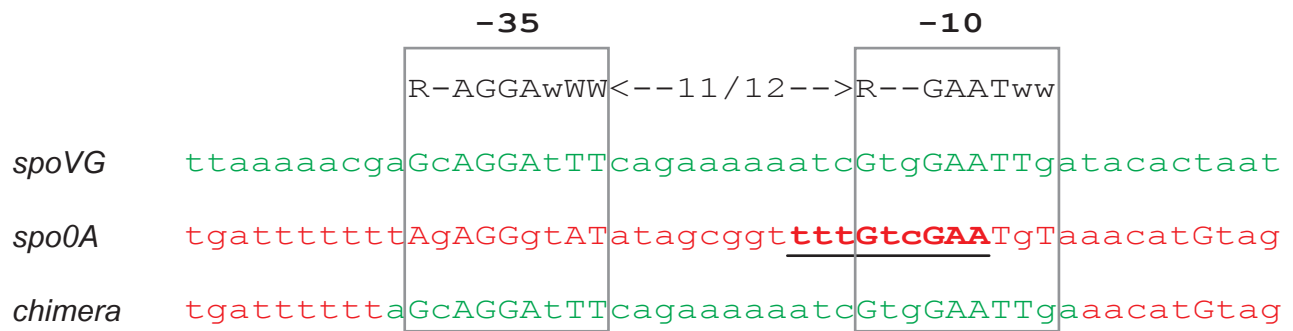

**Figure sup. 4. Construction of a chimeric promoter between  $P_s$  and  $P_{spoVG}$ . 31 bp**

corresponding to the *spoVG* promoter (green) and containing the -35 and -10 sequences for  $\sigma^H$ -RNA polymerase were introduced in place of the -35 and -10 sequences of the *spo0A*  $P_s$  promoter (red) to create a chimeric regulatory region. Aligned are sequences of *spoVG*, *spo0A* and the chimeric promoter corresponding to the region containing the -35 and -10 sequences.

Capital letters indicate bases matching the  $\sigma^H$ -RNA polymerase consensus binding motif (Upper row - according to(3)). The *spo0A* operator  $O_4$  is highlighted with underlined bold letters.

Fig sup 5

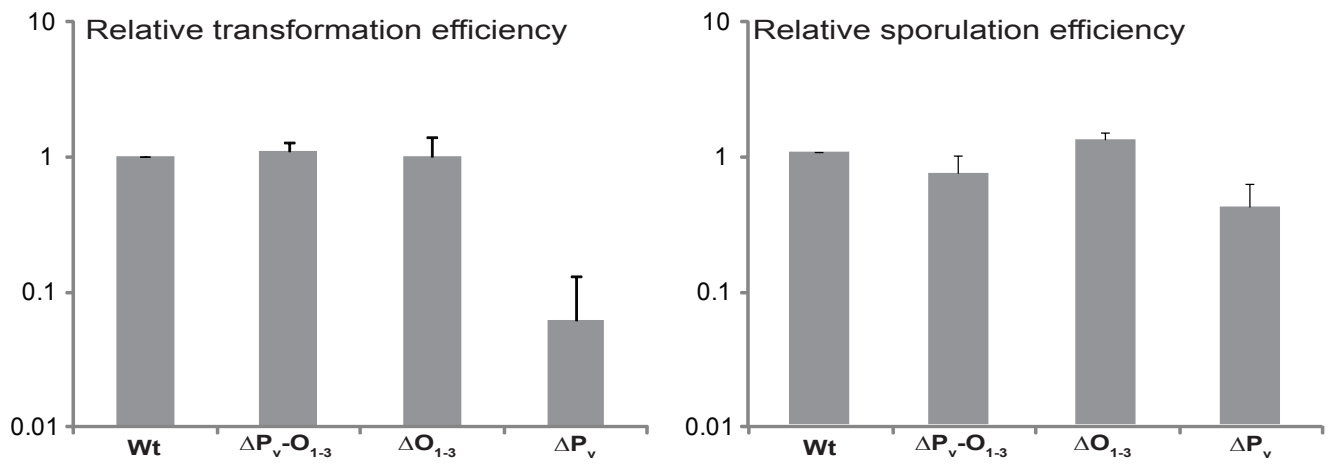

**Figure sup. 5. A mutant lacking  $P_v$  is slightly inhibited for sporulation and impaired for DNA-mediated transformation (competence).**

Transformation and sporulation efficiencies were compared between wild type cells (Wt; PY79), cells mutant for  $O_{1-3}$  ( $\Delta O_{1-3}$ ; Abs883),  $P_v$  ( $\Delta P_v$ ; Abs894), and  $P_v$  plus  $O_{1-3}$  ( $\Delta P_v O_{1-3}$ ; Abs875), and expressed as the ratio to the wild type. For the competence assay (left panel), cells were transformed with 0.5  $\mu\text{g}$  of DNA conferring resistance to spectinomycin and frequencies of transformants were calculated as the ratio of spectinomycin-resistant cells to the total number of cells. Values are averages of two independent experiments. For the sporulation assay, the frequency of sporulation after 30 h in sporulation conditions was calculated as the number of heat-resistant cells after 20 min at 80°C to the total number of cells. Values are averages of at least two independent experiments.
